# Supplementary material for: A new Andean genus, Lafontaineana, with descriptions of four new species and two new Neotropical species of Panthea (Noctuidae, Pantheinae)
Source: Zookeys. 2021 Apr 6;1028:113–34. doi: 10.3897/zookeys.1028.56784 (PMC8044069; doi:10.3897/zookeys.1028.56784)
Supplement: Supplementary material 3 — Table S1 [file zookeys-1028-113-s003.xlsx]

## Sheet: Sheet1
GenBank #	Bold ID #	Family	Subfamily	Genus	Species	Source	Country	State-Province	Collection	Remarks
MT246497	Arcec 31097	Noctuidae	Pantheinae	Lafontaineana	alexandrae	Public Data	Ecuador	Zamora-Chinchipe	FSU	Holotype
MT246491	MGCL-NOC-65241	Noctuidae	Pantheinae	Lafontaineana	imama	Public Data	Colombia	Tolima	MGCL	Holotype
MT246493	MGCL-NOC-65368	Noctuidae	Pantheinae	Lafontaineana	marmorifera	Public Data	Colombia	Cundinamarca	MGCL
MT246498	Arcec 30239	Noctuidae	Pantheinae	Lafontaineana	thuta	Public Data	Ecuador	Loja	FSU	Holotype
MT246495	MGCL-NOC-65211	Noctuidae	Pantheinae	Lichnoptera	gulo	Public Data	Colombia	Cundinamarca	MGCL
N/A	MGCL-NOC-65245	Noctuidae	Pantheinae	Lichnoptera	albidiscata	Public Data	Ecuador	Pichincha	MGCL
N/A	16-SRNP-100307	Noctuidae	Pantheinae	Lichnoptera	illudens	Public Data	Costa Rica	Guanacaste	MGCL
N/A	CNCLEP00116276	Noctuidae	Pantheinae	Lichnoptera	durango	Public Data	Mexico	Durango	CNC
N/A	Arcec 30166	Noctuidae	Pantheinae	Lichnoptera	moestoides	Public Data	Ecuador	Zamora-Chinchipe	FSU
N/A	LEP-75407	Noctuidae	Pantheinae	Lichnoptera	atrifrons	Public Data	Colombia	Cundinamarca	MGCL
MN914705	MGCL-NOC-65272	Noctuidae	Pantheinae	Cicadoforma	ocelotus	Public Data	Colombia	Cundinamarca	MGCL
MN914702	Arcec 32284	Noctuidae	Pantheinae	Cicadomorphus	lilianae	Public Data	Ecuador	Zamora-Chinchipe	MGCL
MN914707	MGCL-NOC-65232	Noctuidae	Pantheinae	Gaujonia	kanakusika	Public Data	Colombia	Santander	MGCL
MN914690	MGCL-NOC-65224	Noctuidae	Pantheinae	Millerana	cundinamarquensis	Public Data	Colombia	Cundinamarca	MGCL
MN914695	MGCL-NOC-65307	Noctuidae	Pantheinae	Gaujoptera	amsa	Public Data	Bolivia	Cotapata	MGCL
MN914700	MGCL-NOC-65325	Noctuidae	Pantheinae	Oculicattus	renifera	Public Data	Peru	Cusco	MGCL
N/A	MGCL-NOC-65208	Noctuidae	Pantheinae	Bathyra	sagata	Public Data	Colombia	Cauca	MGCL
N/A	CNCNoctuoidea12130	Noctuidae	Pantheinae	Charadra	deridens	Public Data	Canada	Quebec	CNC
N/A	CNCLEP00113882	Noctuidae	Pantheinae	Meleneta	antennata	Public Data	USA	Utah	CNC
N/A	MGCL-NOC-65338	Noctuidae	Pantheinae	Arctioptera	cavillator	Public Data	Guatemala	Guatemala	MGCL
N/A	CNCLEP00083840	Noctuidae	Pantheinae	Neopanthea	apanthea	Public Data	USA	Arizona	CNC
N/A	CNCNoctuoidea12815	Noctuidae	Pantheinae	Panthea	furcilla	Public Data	USA	Florida	CNC
N/A	CNCLEP80286	Noctuidae	Pantheinae	Panthea	acronyctoides	Public Data	USA	Wyoming	UASM
N/A	BC ZSM Lep 21838	Noctuidae	Pantheinae	Panthea	coenobita	Public Data	Germany	Bavaria	ZSM
N/A	GGAPan 156	Noctuidae	Pantheinae	Panthea	judyae	Public Data	USA	Arizona	UASM
N/A	GGAPan 151	Noctuidae	Pantheinae	Panthea	gigantea	Public Data	USA	Arizona	UASM
N/A	BC ZSM Lep 65091	Noctuidae	Pantheinae	Panthea	florianii	Public Data	China	Sichuan	ZSM
N/A	CNCLEP 80286	Noctuidae	Pantheinae	Panthea	virginarius	Public Data	USA	California	CNC
N/A	GGAPan122	Noctuidae	Pantheinae	Panthea	greyi	Public Data	USA	Arizona	CNC
N/A	LEP-75402	Noctuidae	Pantheinae	Panthea	guatemala	Public Data	Guatemala	Baja Verapaz	MGCL
N/A	LEP-75397	Noctuidae	Pantheinae	Panthea	hondurensis	Public Data	Honduras	Francisco Morazan	MGCL	Holotype
N/A	JN401249	Noctuidae	Pantheinae	Varmina	indica	Public Data	India		GenBank
